# Supplementary material
Source: publisher figshare collection journal article supplement (https://acs.figshare.com/ndownloader/files/7221161)
Supplement: Supplementary file 1 [file 7221161]

## Supporting Information

### Electrochemical and *In Situ* Spectroscopic Evidences towards Empowering Ruthenium Based Chalcogenides as Solid Acid Fuel Cell Cathodes

Shraboni Ghoshal<sup>1</sup>, Qingying Jia<sup>1</sup>, Jingkun Li<sup>1</sup>, Fernando Campos<sup>2</sup>, Calum. R.I Chisholm<sup>2</sup> and Sanjeev Mukerjee<sup>1\*</sup>

<sup>1</sup>Department of Chemistry, Northeastern University, Boston, MA 02115

<sup>2</sup>SAF Cell Inc., 36 S. Chester Ave, Pasadena, CA 91106

\*To whom correspondence should be addressed. Email: s.mukerjee@neu.edu

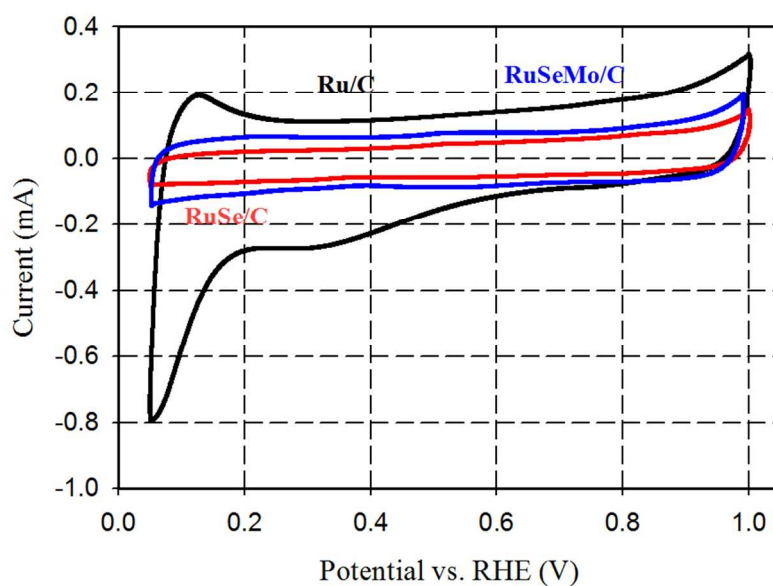

**Figure S1.** Cyclic voltammogram of Ru/C, RuSe/C and RuSeMo/C (all HT) in Ar purged 0.1M HClO<sub>4</sub> at 20 mV/sec sweep rate.

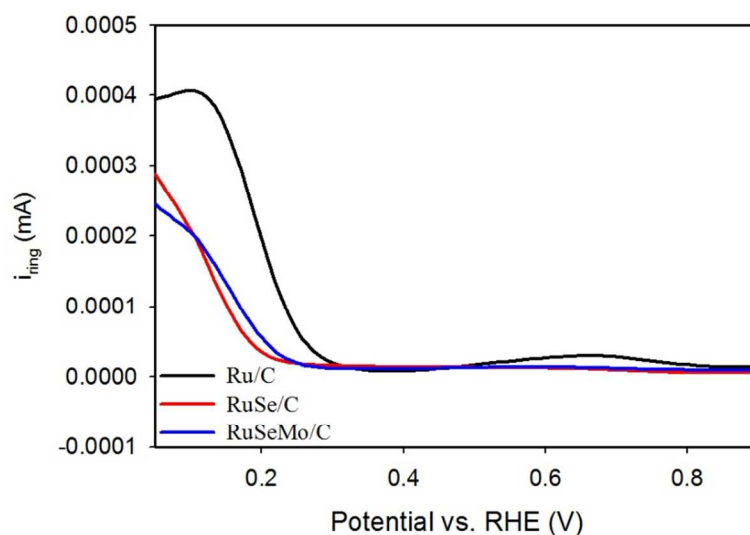

**Figure S2:** Ring current response for Ru/C, RuSe/C and RuSeMo/C in O<sub>2</sub> purged 0.1M HClO<sub>4</sub> collected at 1600 rpm at a scan rate of 20 mV/sec.

Ring data calculations:

The following equations were used to calculate the number of electrons transferred and H<sub>2</sub>O selectivity:

$$n_e = \frac{4I_D}{I_D + \frac{I_R}{N}}$$

$$\text{selectivity H}_2\text{O} = \frac{I_D - \frac{I_R}{N}}{I_D + \frac{I_R}{N}} * 100$$

**Table S1. Summarization of results obtained from RDE and RRDE measurements and comparison between Ru/C, RuSe/C and RuSeMo/C (all HT) catalysts**

| Catalysts | $n_e$ from K-L analysis | $n_e$ from RRDE @ 0.2V<br>vs. RHE | Selectivity H <sub>2</sub> O @ 0.2V<br>vs. RHE |
|-----------|-------------------------|-----------------------------------|------------------------------------------------|
| Ru/C      | 2.95                    | 2.47                              | 80%                                            |
| RuSe/C    | 3.17                    | 3.23                              | 92.5%                                          |
| RuSeMo/C  | 3.5                     | 3.6                               | 96.8%                                          |

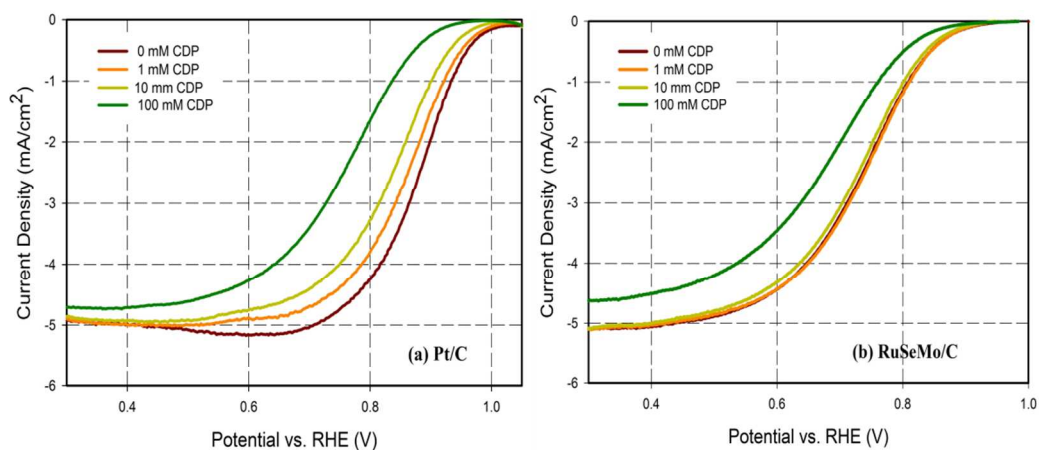

**Figure S3.** Oxygen reduction reaction on (a) Pt/C and (b) 30% RuSeMo/C (all heat treated) in  $O_2$ -saturated 0.1M  $HClO_4$  electrolyte in presence of cesium dihydrogen phosphate collected at 1600 rpm and 20 mV/sec scan rate.

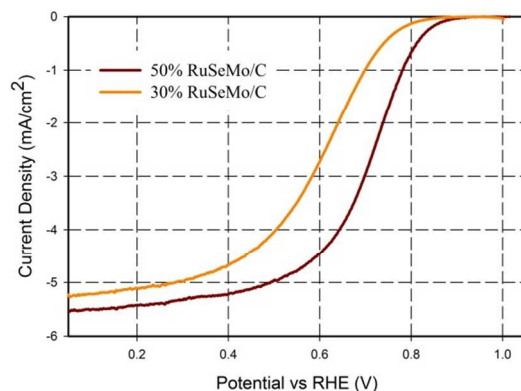

**Figure S4.** Oxygen reduction reaction on 30% RuSeMo/C and 50% RuSeMo/C (all heat treated) in  $O_2$ -saturated 0.1M  $HClO_4$  electrolyte, collected at 1600 rpm and 20 mV/sec scan rate.

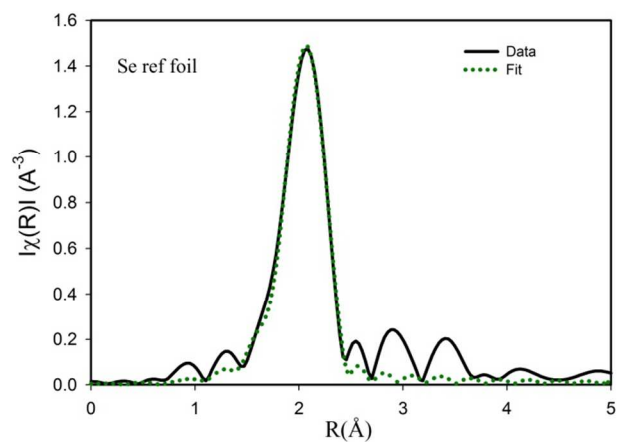

**Figure S5.** FT EXAFS for Se reference foil

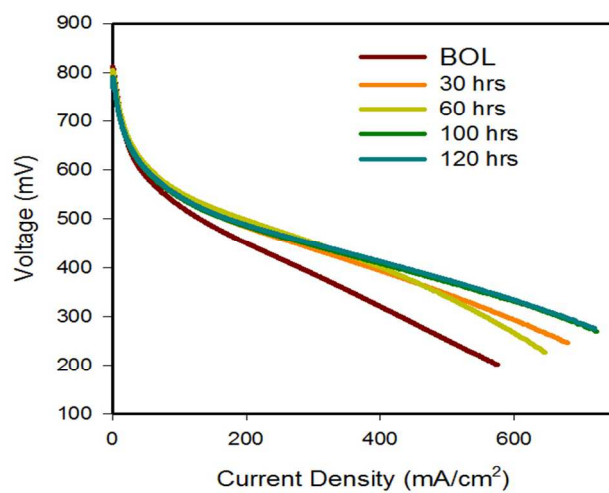

**Figure S6.** Durability test for 30% RuSeMo/C catalyst in SAFC operated at 250°C, with H<sub>2</sub> and air as anode and cathode gas feeds, respectively. Loading of Ru in the MEA: 1.2 mg/cm<sup>2</sup>

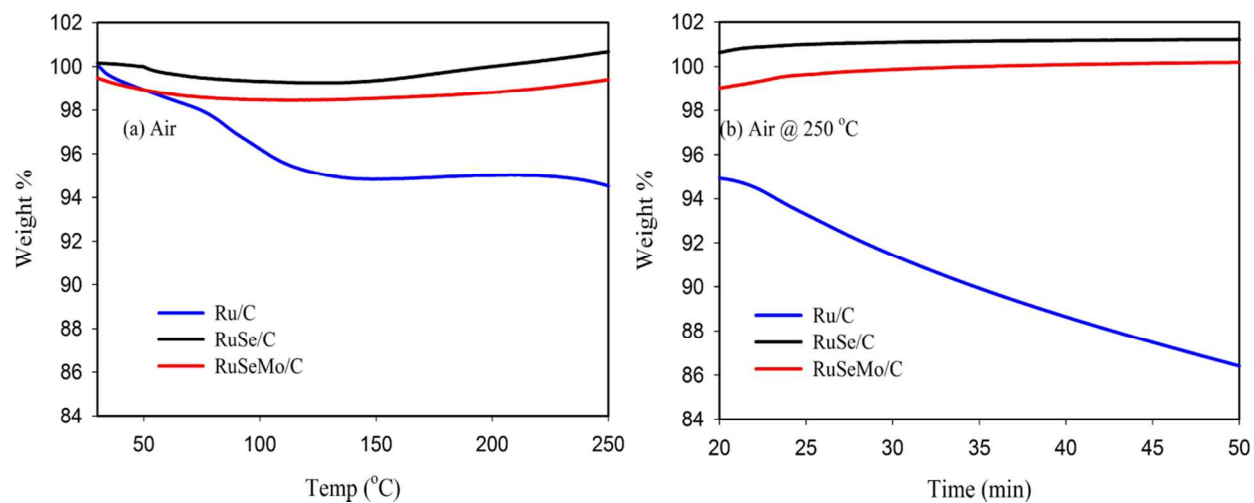

**Figure S7:** TGA profiles of Ru/C, RuSe/C and RuSeMo/C catalysts when heated till 250°C under air. (a) Catalytic weight loss/gain when heated till 250°C and (b) Catalytic weight loss/gain when held at 250°C for 30 minutes
